# Supplementary material
Source: bioRxiv or medRxiv preprint supplement (https://www.biorxiv.org/highwire/filestream/110259/field_highwire_adjunct_files/0/364463-1.pdf)
Supplement: Supplementary file [file 364463-1.pdf]

**Table S1. Inactivation of PI31 in neurons results in an eclosion defect.**

| Genotype                 | Eclosion rate   |
|--------------------------|-----------------|
| <i>nrv2-GAL4</i>         | 98.5% (463/470) |
| <i>UAS-PI31 RNAi</i>     | 98.2% (163/166) |
| <i>nrv2&gt;PI31 RNAi</i> | 0% (0/115)      |
